# Supplementary material for: Social inequalities in pregnancy metabolic profile: findings from the multi-ethnic Born in Bradford cohort study
Source: bioRxiv or medRxiv preprint supplement (doi:10.1101/2024.02.08.24302335), 2024-02-08
Supplement: Supplementary file [file media-5.pdf]

## Pakistani

|                                                                       |      |      |      |
|-----------------------------------------------------------------------|------|------|------|
| Housing tenure: owns outright                                         | 0.19 | 0.37 | 0.28 |
| Living comfortably (managing financially)                             | 0.06 | 0.26 | 0.48 |
| Able to afford to replace any worn out furniture                      | 0.16 | 0.93 | 0.96 |
| Able to afford to replace/repair major electrical goods               | 0.32 | 0.96 | 0.98 |
| Mother currently employed                                             | 0.13 | 0.14 | 0.47 |
| Able to afford household contents insurance                           | 0.5  | 0.91 | 0.96 |
| Father in non-manual occupation                                       | 0.25 | 0.19 | 0.57 |
| Better off financially than year ago                                  | 0.2  | 0.31 | 0.38 |
| Least deprived third of IMD                                           | 0.15 | 0.11 | 0.34 |
| Able to afford to make regular savings of 10 pounds/month             | 0.44 | 0.92 | 0.97 |
| Able to afford a small amount of money to spend on yourself each week | 0.57 | 0.96 | 0.99 |
| Mother's education: <5 GCSE                                           | 0.34 | 0.37 | 0.07 |
| Father's education: <5 GCSE                                           | 0.27 | 0.28 | 0.04 |
| Lowest third of overcrowding                                          | 0.33 | 0.23 | 0.47 |
| Up to date with bills                                                 | 0.79 | 0.95 | 0.98 |
| Able to afford to keep home in decent state of decoration             | 0.6  | 0.98 | 0.99 |
| Means tested benefits                                                 | 0.59 | 0.58 | 0.17 |
| Able to afford two pairs of all-weather shoes                         | 0.97 | 1    | 1    |
| Able to keep home warm enough in winter                               | 0.88 | 0.99 | 0.99 |

Lowest SEP  
n=1064 (27.9%)

Medium SEP  
n=1592 (41.8%)

Highest SEP  
n=1153 (30.3%)

Estimated probability

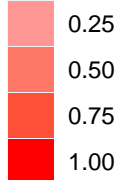

## White British

|                                                                       |      |      |      |      |      |
|-----------------------------------------------------------------------|------|------|------|------|------|
| Housing tenure: owns outright                                         | 0.01 | 0.04 | 0.03 | 0.06 | 0.05 |
| Living comfortably (managing financially)                             | 0.03 | 0.23 | 0.02 | 0.35 | 0.55 |
| Able to afford to replace any worn out furniture                      | 0.05 | 0.87 | 0.2  | 0.97 | 0.96 |
| Able to afford to replace/repair major electrical goods               | 0.05 | 0.85 | 0.25 | 0.96 | 0.98 |
| Mother currently employed                                             | 0.14 | 0.23 | 0.72 | 0.91 | 0.93 |
| Able to afford household contents insurance                           | 0.15 | 0.69 | 0.88 | 0.99 | 1    |
| Father in non-manual occupation                                       | 0.19 | 0.26 | 0.55 | 0.53 | 0.88 |
| Better off financially than year ago                                  | 0.16 | 0.37 | 0.15 | 0.33 | 0.32 |
| Least deprived third of IMD                                           | 0.26 | 0.19 | 0.55 | 0.59 | 0.82 |
| Able to afford to make regular savings of 10 pounds/month             | 0.22 | 0.8  | 0.44 | 0.96 | 0.97 |
| Able to afford a small amount of money to spend on yourself each week | 0.35 | 0.84 | 0.56 | 0.97 | 1    |
| Mother's education: <5 GCSE                                           | 0.48 | 0.5  | 0.11 | 0.12 | 0.01 |
| Father's education: <5 GCSE                                           | 0.55 | 0.55 | 0.14 | 0.19 | 0.03 |
| Lowest third of overcrowding                                          | 0.62 | 0.37 | 0.62 | 0.69 | 0.92 |
| Up to date with bills                                                 | 0.63 | 0.86 | 0.8  | 0.97 | 1    |
| Able to afford to keep home in decent state of decoration             | 0.78 | 1    | 0.9  | 1    | 1    |
| Means tested benefits                                                 | 0.87 | 0.69 | 0.34 | 0.17 | 0.04 |
| Able to afford two pairs of all-weather shoes                         | 0.83 | 0.98 | 0.95 | 0.99 | 1    |
| Able to keep home warm enough in winter                               | 0.9  | 1    | 0.97 | 1    | 1    |

Lowest SEP  
n=605 (16.5%)

Low Medium SEP  
n=547 (14.9%)

Medium SEP  
n=549 (15.0%)

High Medium SEP  
n=1284 (35.0%)

Highest SEP  
n=680 (18.9%)
