# Supplementary material for: Social inequalities in pregnancy metabolic profile: findings from the multi-ethnic Born in Bradford cohort study
Source: bioRxiv or medRxiv preprint supplement (doi:10.1101/2024.02.08.24302335), 2024-02-08
Supplement: Supplementary file [file media-8.pdf]

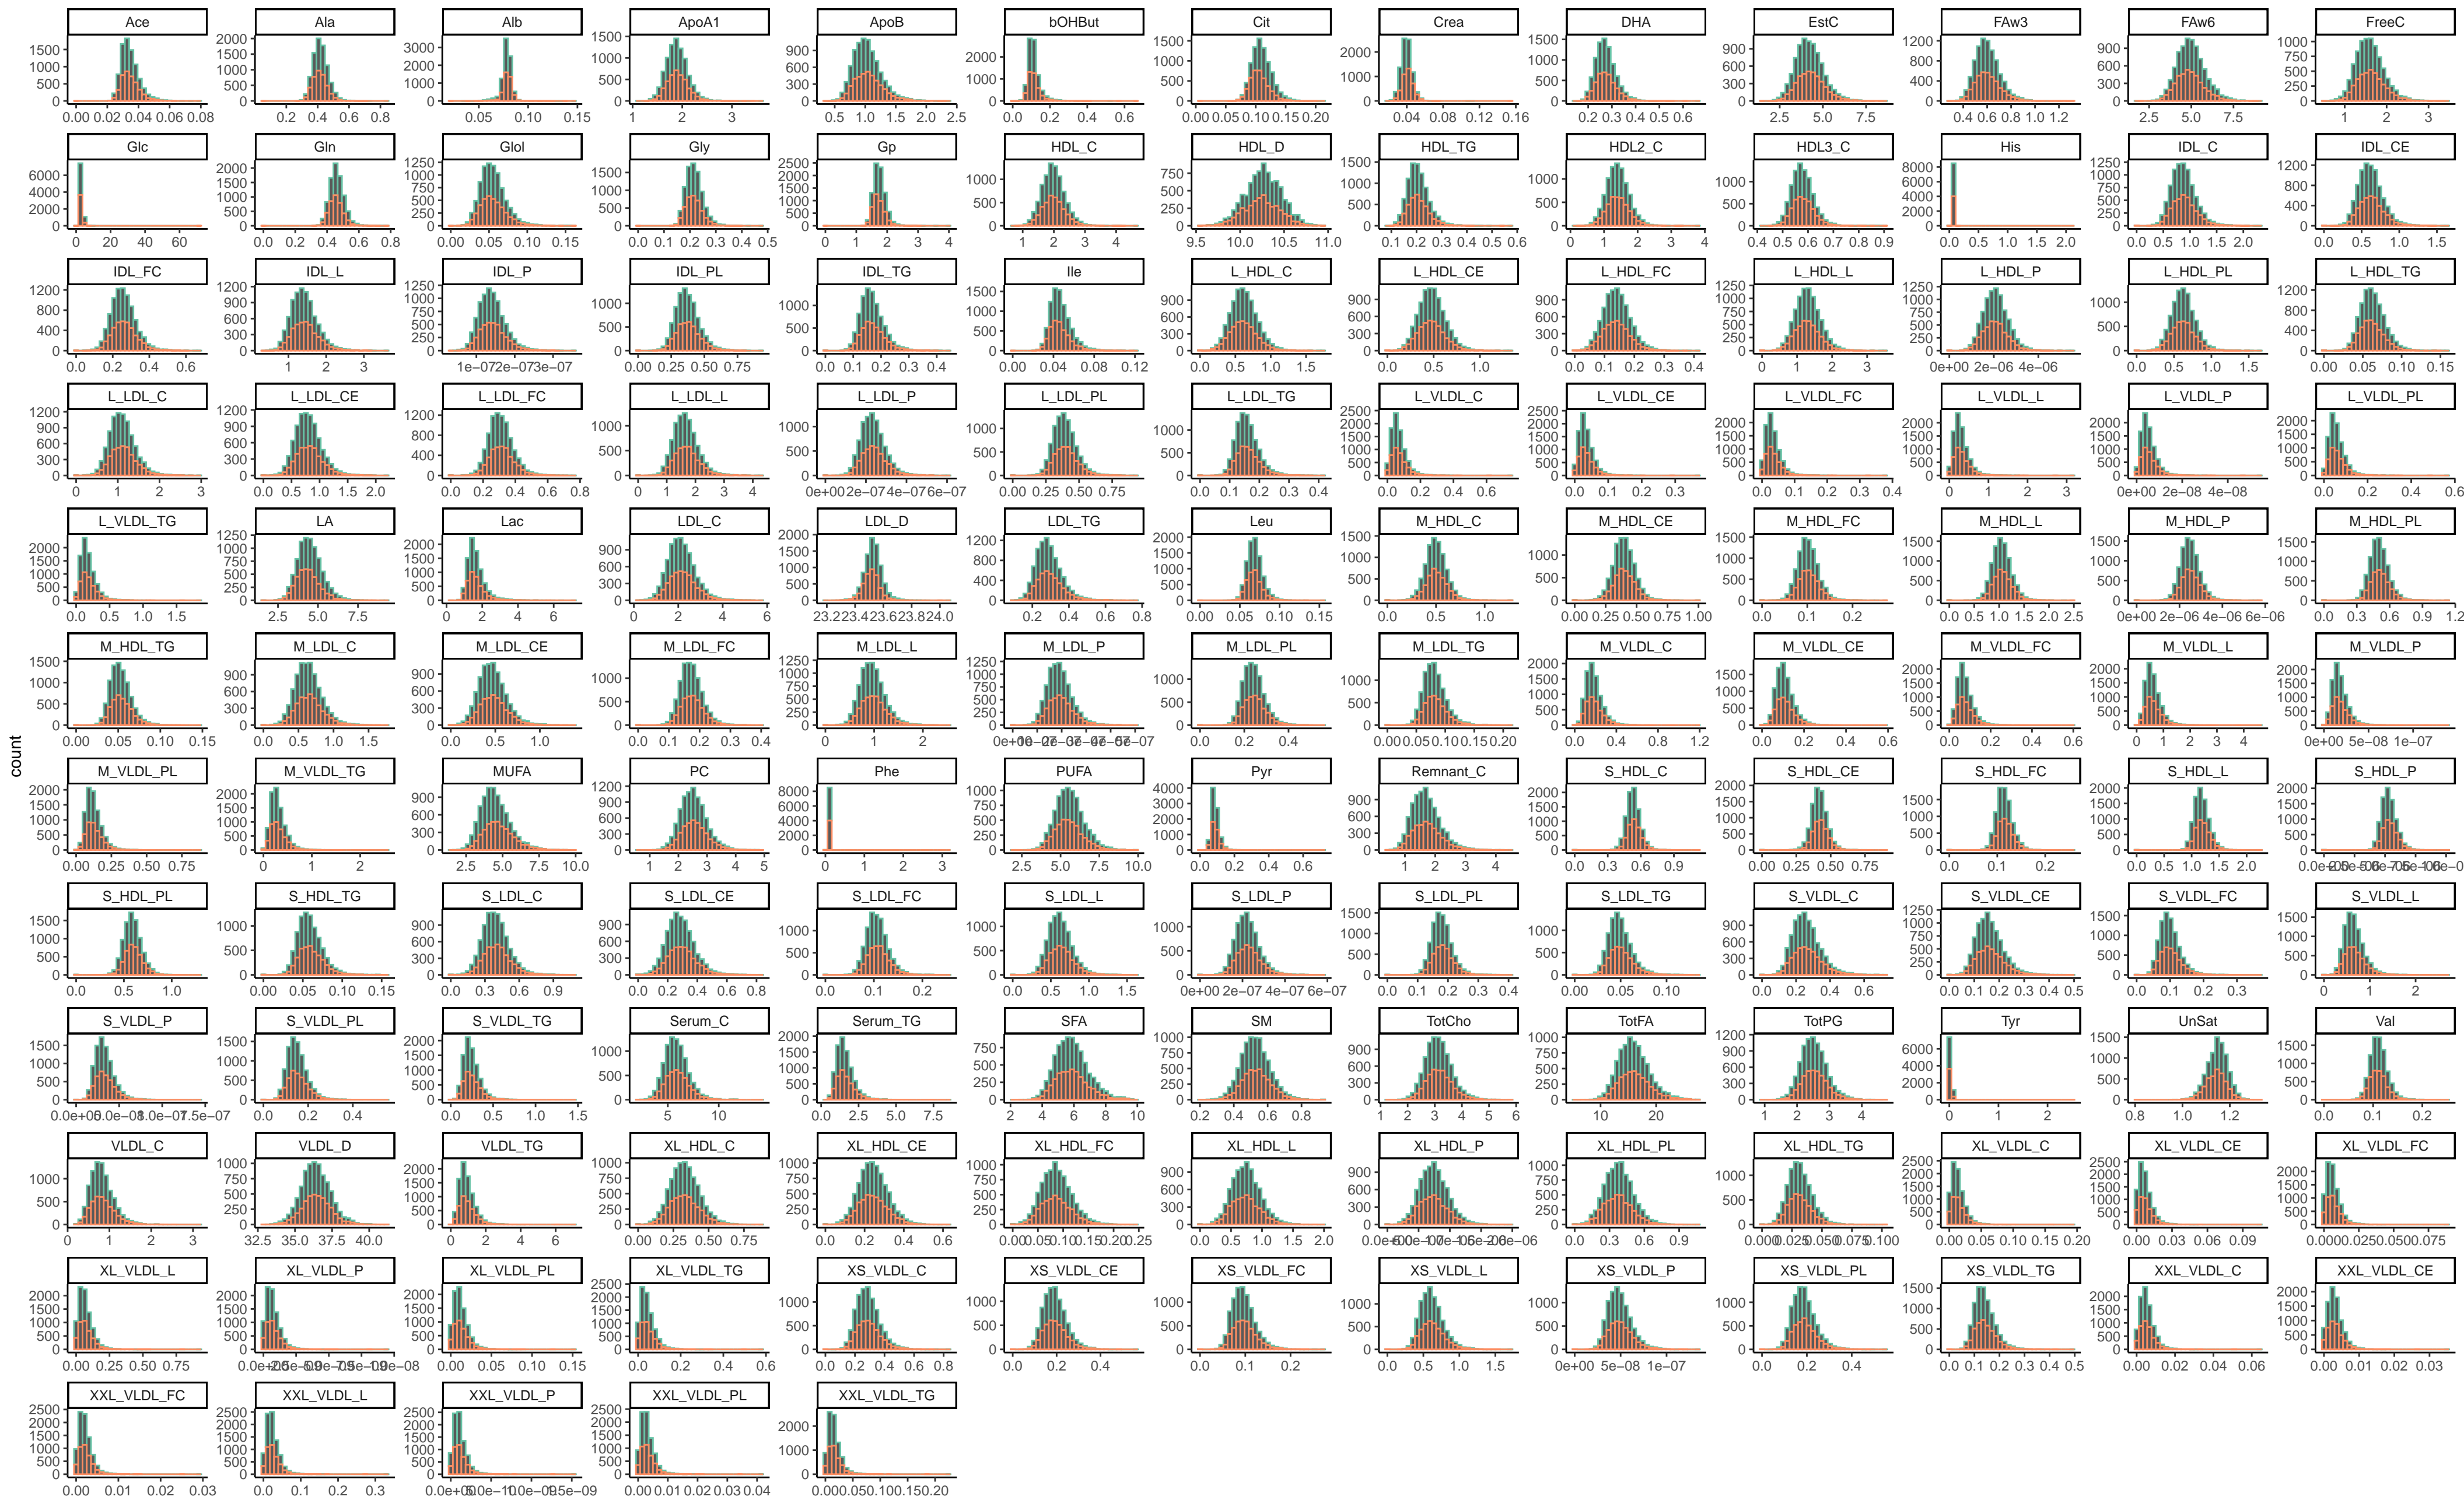

South Asian White European
